# Supplementary material for: Cancer Cell–Derived Matrisome Proteins Promote Metastasis in Pancreatic Ductal Adenocarcinoma
Source: Oxford University Press journal article supplement (doi:10.1158/0008-5472.can-19-2578), 2020-02-06
Supplement: 00085472can192578-sup-227645_2_supp_6031304_q4wqv3.xlsx [file 00085472can192578-sup-227645_2_supp_6031304_q4wqv3.xlsx]

## Sheet: Sheet1
	Genes	Species	Assays	Forward/Reverse	Sequence
	AGRN	mouse	qPCR	Forward	GCACACCTACTCCTGCAAG
				Reverse	CTGGTTGTCGCAGATGAGG
		human	qPCR	Forward	CTCAACTCCAGCCTCATGC
				Reverse	GAAGCCGCACAGCATTC
	SERPINB5	mouse	qPCR	Forward	CTCTACTTCTCTGTCCCTTGC
				Reverse	GTGACTGTTTGAAACCCAAAGG
		human	qPCR	Forward	AGCATCTCAGCATGTTCATCC
				Reverse	TGGAGAGTTTGACCTTGGC
	CSTB	mouse	qPCR	Forward	GATCTGTCTTCAGCTTCTCCG
				Reverse	TCGATTCAAGCTGGGACTTC
		human	qPCR	Forward	GGTCCCAGCTTGAAGAGAAAG
				Reverse	AGAGATTGGAACACTCGCAG
	ACTB	human and mouse (ACTB_1)	qPCR/PCR	Forward	CCAACACAGTGCTGTCTGG
				Reverse	CCTGCTTGCTGATCCACATCTG
		human only (ACTB_2)	qPCR/PCR	Forward	ACAGAGCCTCGCCTTTG
				Reverse	GGTACTTCAGGGTGAGGATG
	FN1	human only	qPCR/PCR	Forward	TTACAGACCTATCCAAGCTCAAG
				Reverse	GTGTAGGAGTTTAAGTGGCCT
	SNAI1	human only	qPCR/PCR	Forward	GCCTTCAACTGCAAATACTGC
				Reverse	CTTCTTGACATCTGAGTGGGTC
	TWIST1	human only	qPCR/PCR	Forward	CTCAGCTACGCCTTCTCG
				Reverse	GGTGTGAGGATGGTGCC
